# Supplementary material
Source: Springer Nature journal article supplement (https://www.springermedizin.de/resource/supplementary/12889_2007_1061_MOESM1_ESM.pdf/9503244)
Supplement: MOESM1 [file 9503244]

## Self-management

### Daily activities

### Off-course

### Preventive

---

Adhering

Becoming aware

Experiencing

Adapting

Reasoning

Learning

Acting routinely

Deciding

Being cautious

Acting

Putting into practice

Evaluating
